# Supplementary material for: Sleeping Beauty Insertional Mutagenesis in Mice Identifies Drivers of Steatosis-Associated Hepatic Tumors
Source: Oxford University Press journal article supplement (doi:10.1158/0008-5472.can-17-2281), 2017-10-09
Supplement: 00085472can172281-sup-187014_2_supp_4291083_nwx69n.xlsx [file 00085472can172281-sup-187014_2_supp_4291083_nwx69n.xlsx]

## Sheet: Table S1
Supplementary Table S1: qRT-PCR primer sequences
Transcript	Primer sequences	Amplicon size (bp)	Annealing temperature (°C)
β-actin	5′-TCCAGCCTTCCTTCTTGGGTATGGA-3′	365	57
	5’-CGCAGCTCAGTAACAGTCCGCC-3’
FoxA1	5’-GGATGGTTGTGTCGGCCGGG-3’	113	60
	5’-AGGAGTAGGCCTCCTGCGTGT-3’
ApoM	5’- ACTGCAGAGCACCAACTCTC-3’	492	57
	5’-GGGTGTGGTGACCGATTGTA-3’
Nat10	5’-GGCCTTGCTGTCATACCAGT-3’	281	57
	5’- TTCCCAAGAGAAGAGCCGAC-3’
Fah	5’-TTACTCCCACAGCTCCTGG-3’	275	55
	5’-TGGCTTTGGGTTGCTTTGAG-3’
PCR was performed with an initial denaturing step of 95°C for 15 min; 40-cycles of denaturing at 94°C for 15 sec, annealing at above specified temperatures, and extension at 72°C for 30 sec with optics on.

## Sheet: Table S2
Supplementary Table S2: Antibodies for IHC
Protein	Antibody	Dilution
SB	R&D Systems MAB2798	1:100
ALB	Novus Biologicals NBP132458	1:200
FOXA1	Abcam AB23738	1:200
phospho T156 FOXA2	Abgent AP13206C	1:100
NAT10	Abcam AB194297	1:250
FAH	AbboMax 602-910	1:250
phospho T197 PKA	Abcam AB59218	1:1000

## Sheet: Table S3
Supplementary Table S3: Parameters for histological stain quantification to measure liver fat percentage
Stain	H&E
Quantification software	Aperio ImageScope Positive Pixel Count (Leica)
Measurement box size	1000 x 1000 pixels
Data collection	Measurements from 5 representative boxes per slide were averaged
Hue value	0.05
Hue width	.999999 (all stained pixels)
Negative pixel intensity threshold	255 (all pixels)
Weak positive pixels (wpp) defined as	white (fat droplets)
Wpp intensity threshold upper limit	255
Wpp intensity threshold lower limit	218
Strong positive pixels (spp) defined as	stained tissue
Spp intensity threshold lower limit	0
Variables measured	spp count
	wpp count
Final readout	Liver fat percentage = 100%*spp/(wpp+spp)

## Sheet: Table S4
Supplementary Table S4: Parameters for histological stain quantification to measure FOXA1 immunohistochemistry levels
Stain	FOXA1 immunohistochemistry
Quantification software	Aperio ImageScope Positive Pixel Count (Leica)
Measurement box size	1000 x 1000 pixels
Data collection	Measurements from 5 representative boxes per slide were averaged
Hue value	0.1
Hue width	0.16
Color saturation threshold	0.04
Positive pixel intensity threshold upper limit	230
Positive pixel intensity threshold lower limit	0
Negative pixel intensity threshold	230
Variables measured	brown stained pixel intensity
	positive pixel count
Final readout	FOXA1 IHC level = 1000/(brown stained pixel intensity)/(positive pixel count)

## Sheet: Table S5
Supplementary Table S5: Parameters for histological stain quantification of the percentage of FOXA2 immunohistochemistry-stained positive nuclei
Stain	FOXA2 immunohistochemistry
Quantification software	Aperio ImageScope Positive Pixel Count (Leica)
Measurement box size	1000 x 1000 pixels
Data collection	Measurements from 5 representative boxes per slide were averaged
Negative immunohistochemistry stain defined as	Nuclear hematoxylin
Nuclear hematoxylin OD values:
Red	0.706
Green	0.629
Blue	0.33
Positive immunohistochemistry stain defined as	Nuclear DAB
Nuclear DAB OD values:
Red	0.244583
Green	0.509334
Blue	0.825081
Cytoplasm intensity threshold	230
Intensity threshold upper limits
Weak positive nuclei	220
Medium positive nuclei	188
Strong positive nuclei	162
Positive nuclei ntensity threshold lower limit	0
Minimum elongation	0.4
Minimum compactness	0.4
Minimum roundness	0.4
Maximum nuclear size	300 um2
Minimim nuclear size	20 um2
Intensity thresholding upper limit	164
Intensity thresholding lower limit	0
Nuclear segmentation type	Cytoplasmic rejection
Variables measured	Positive (DAB) stained nuclei
	Negative (Hematoxylin) stained nuclei
Final readout	% FOXA2 positive nuclei = 100%*(positive stained nuclei)/(negative stained nuclei + positive stained nuclei)

## Sheet: Table S6
Supplementary Table S6: Parameters for histological stain quantification to measure immunohistochemistry stain levels for p-FOXA2, NAT10, and p-PKA with ImageJ
Stain	DAB immunohistochemistry
Quantification software	Immunohistochemistry Image Analysis Toolbox (ImageJ)
Measurement box size	100 x 100 pixels
Data collection	Measurements from 3 representative boxes per slide were averaged
Upper intensity threshold	185
Lower intensity threshold	10
Background pixels	NaN (excludes fat droplets)
Variables measured	average brown stained pixel intensity
Final readout	IHC stain level = 1000/(Average brown stained pixel intensity)
